# Supplementary material
Source: PubMed Central journal article supplement (PMC5866977)
Supplement: BPH-175-1157-s001.pdf [file BPH-175-1157-s001.pdf]

Figure S1. The changes of cathepsins mRNA levels following L-Hcy stimulation.

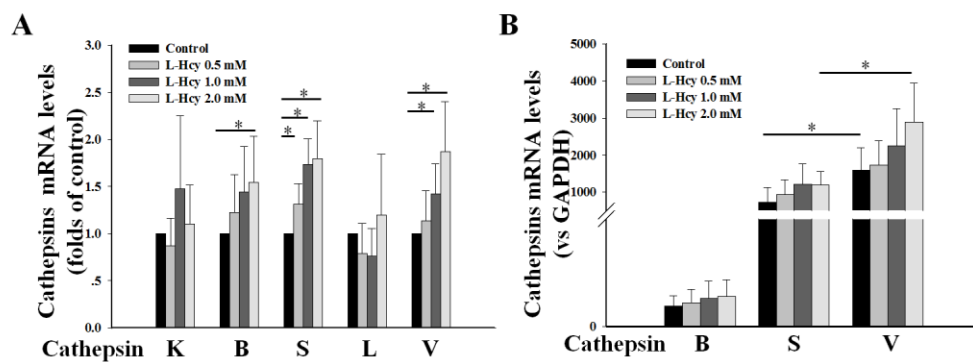

Figure S1. (A) HUVECs were treated with 0.5–2.0 mM L-Hcy for 24 h, real-time PCR was used to assess cathepsins mRNA expression, the control group as a reference in each cathepsin expression analysis. (B) The expression of cathepsin B, S, and V induced by L-Hcy was detected by real-time PCR. The data shown are the mean  $\pm$ SD of five independent experiments. \* $p$ <0.05.
